# Supplementary material for: Dual-Warhead Conjugate Based on Fibroblast Growth Factor 2 Dimer Loaded with α-Amanitin and Monomethyl Auristatin E Exhibits Superior Cytotoxicity towards Cancer Cells Overproducing Fibroblast Growth Factor Receptor 1
Source: MDPI journal article supplement (doi:10.3390/ijms241210143), 2023-06-14
Supplement: s1 [file s1]

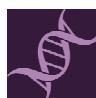

Supplementary Materials

# Dual-Warhead Conjugate Based on Fibroblast Growth Factor 2 Dimer Loaded with $\alpha$ -Amanitin and Monomethyl Auristatin E Exhibits Superior Cytotoxicity Towards Cancer Cells Over-producing Fibroblast Growth Factor Receptor 1

Daria Nawrocka, Mateusz Adam Krzysscik <sup>†</sup>, Katarzyna Dominika Sluzalska and Jacek Otlewski <sup>\*</sup>

Department of Protein Engineering, Faculty of Biotechnology, University of Wrocław, Joliot-Curie 14a, 50-383 Wrocław, Poland

<sup>\*</sup> Correspondence: jacek.otlewski@uwr.edu.pl; Tel.: +48-71-375-28-24

<sup>†</sup> Current address: Institute for NanoBioTechnology, Whiting School of Engineering, Johns Hopkins University, 3400 N Charles St, Baltimore MD 21218

**Table S1.** Flow cytometric analysis of FGF2 binding and cellular internalization. The cells were incubated on ice with 20 nM DyLight 650-labeled FGF2 for 40 min, then transferred to 37 °C for 30 min. Relative intensity change was normalized to the non-treated cells. Results represent the relative fluorescence intensities ( $\Delta I/I_0$ ) from three independent experiments. Values of the relative fluorescence intensities are the means for each data set  $\pm$  SD. Statistical significance (versus HCC95 cells): \*\*  $p < 0.01$ , \*\*\*  $p < 0.001$ .

| Cell line | Relative intensity change ( $\Delta I/I_0$ ) |
|-----------|----------------------------------------------|
| HCC95     | 0.6513 $\pm$ 0.06759                         |
| NCI-H520  | 4.359 $\pm$ 0.7984***                        |
| NCI-H1581 | 2.604 $\pm$ 0.2655***                        |
| G292      | 1.506 $\pm$ 0.08039***                       |
| JIMT-1    | 1.079 $\pm$ 0.1031**                         |
